# Supplementary material
Source: Elsevier journal article supplement (https://comptes-rendus.academie-sciences.fr/biologies/article/10.1016/j.crvi.2011.02.003/file/attach/mmc1.pdf)
Supplement: mmc1 [file mmc1.pdf]

## Microsatellite and minisatellite markers based DNA fingerprinting and genetic diversity of blast and ufra resistant genotypes

M. Abdul Latif<sup>a</sup>, M. Yusop Rafii<sup>a</sup>, M. Moshiur Rahman<sup>b</sup>, M.R. Badiuzzaman Talukdar<sup>b</sup>

Appendix 1. Binary outputs of SSR and VNTR markers over 14 blast resistant and susceptible genotypes

| Markers | BR14 | BR16 | BR28 | BR29 | BR36 | BR6017 | IR45912 | IR60913 | NJ70507 | NR11 | OM1207 | QINGLIALI1 | S1P1692033 | ZhongYu7 |
|---------|------|------|------|------|------|--------|---------|---------|---------|------|--------|------------|------------|----------|
| GF1     | 1    | 0    | 1    | 0    | 0    | 0      | 0       | 0       | 0       | 1    | 1      | 0          | 1          | 1        |
| GF2     | 1    | 1    | 1    | 0    | 0    | 0      | 0       | 0       | 0       | 0    | 1      | 0          | 1          | 0        |
| GF3     | 1    | 0    | 1    | 0    | 0    | 0      | 0       | 1       | 1       | 1    | 1      | 0          | 1          | 0        |
| GF4     | 1    | 0    | 0    | 0    | 0    | 0      | 1       | 0       | 0       | 1    | 1      | 0          | 1          | 1        |
| GF5     | 1    | 0    | 1    | 0    | 0    | 0      | 1       | 1       | 1       | 1    | 1      | 0          | 1          | 1        |
| GF6     | 0    | 0    | 0    | 0    | 0    | 0      | 0       | 0       | 1       | 0    | 0      | 0          | 0          | 1        |
| MR1     | 1    | 0    | 1    | 1    | 0    | 1      | 1       | 0       | 0       | 1    | 1      | 0          | 1          | 1        |
| MR2     | 0    | 0    | 1    | 1    | 1    | 1      | 1       | 0       | 0       | 1    | 1      | 0          | 1          | 1        |
| MR3     | 0    | 0    | 1    | 1    | 1    | 1      | 1       | 0       | 0       | 1    | 1      | 0          | 1          | 1        |
| MR4     | 0    | 1    | 1    | 1    | 1    | 1      | 1       | 0       | 1       | 1    | 1      | 1          | 1          | 0        |
| MR5     | 1    | 1    | 1    | 1    | 1    | 1      | 1       | 0       | 0       | 1    | 1      | 0          | 1          | 1        |
| RM108   | 1    | 1    | 1    | 1    | 1    | 0      | 1       | 1       | 0       | 1    | 1      | 1          | 0          | 1        |
| RM108   | 0    | 0    | 0    | 0    | 0    | 1      | 0       | 0       | 1       | 0    | 0      | 0          | 1          | 0        |
| RM11    | 0    | 1    | 0    | 0    | 0    | 0      | 0       | 0       | 0       | 0    | 1      | 0          | 0          | 0        |
| RM11    | 1    | 0    | 0    | 0    | 0    | 0      | 0       | 0       | 0       | 0    | 0      | 0          | 1          | 0        |
| RM11    | 0    | 0    | 1    | 1    | 0    | 0      | 0       | 1       | 0       | 1    | 0      | 1          | 0          | 0        |
| RM11    | 0    | 0    | 0    | 0    | 0    | 0      | 0       | 0       | 1       | 0    | 0      | 0          | 0          | 1        |
| RM11    | 0    | 0    | 0    | 0    | 0    | 0      | 1       | 0       | 0       | 0    | 0      | 0          | 0          | 0        |
| RM17    | 0    | 0    | 0    | 0    | 0    | 0      | 0       | 0       | 0       | 0    | 1      | 0          | 0          | 0        |
| RM17    | 0    | 0    | 1    | 0    | 0    | 0      | 1       | 1       | 1       | 1    | 0      | 1          | 0          | 0        |
| RM17    | 1    | 1    | 0    | 0    | 0    | 1      | 0       | 0       | 0       | 0    | 0      | 0          | 1          | 1        |
| RM17    | 0    | 0    | 0    | 0    | 1    | 0      | 0       | 0       | 0       | 0    | 0      | 0          | 0          | 0        |
| RM21    | 0    | 1    | 0    | 1    | 1    | 0      | 0       | 0       | 0       | 0    | 0      | 0          | 1          | 0        |
| RM21    | 0    | 0    | 0    | 0    | 0    | 1      | 1       | 0       | 0       | 0    | 0      | 0          | 0          | 0        |
| RM21    | 0    | 0    | 0    | 0    | 0    | 0      | 0       | 0       | 1       | 0    | 0      | 0          | 0          | 0        |
| RM21    | 0    | 0    | 1    | 0    | 0    | 0      | 0       | 0       | 0       | 0    | 1      | 0          | 0          | 1        |
| RM21    | 1    | 0    | 0    | 0    | 0    | 0      | 0       | 1       | 0       | 1    | 0      | 1          | 0          | 0        |
| RM23    | 0    | 0    | 0    | 0    | 0    | 1      | 1       | 1       | 0       | 1    | 1      | 0          | 0          | 1        |

| Markers | BR14 | BR16 | BR28 | BR29 | BR36 | BR6017 | IR45912 | IR60913 | NJ70507 | NR11 | OM1207 | QINGLIALI1 | S1P1692033 | ZhongYu7 |
|---------|------|------|------|------|------|--------|---------|---------|---------|------|--------|------------|------------|----------|
| RM23    | 1    | 0    | 0    | 0    | 0    | 0      | 0       | 0       | 0       | 0    | 0      | 0          | 1          | 0        |
| RM23    | 0    | 0    | 1    | 1    | 1    | 0      | 0       | 0       | 0       | 0    | 0      | 0          | 0          | 0        |
| RM23    | 0    | 1    | 0    | 0    | 0    | 0      | 0       | 0       | 1       | 0    | 0      | 1          | 0          | 0        |
| RM443   | 0    | 0    | 0    | 0    | 0    | 0      | 0       | 1       | 0       | 1    | 1      | 1          | 1          | 1        |
| RM443   | 0    | 0    | 1    | 1    | 1    | 0      | 0       | 0       | 0       | 0    | 0      | 0          | 0          | 0        |
| RM443   | 0    | 1    | 0    | 0    | 0    | 0      | 0       | 0       | 0       | 0    | 0      | 0          | 0          | 0        |
| RM531   | 0    | 0    | 0    | 0    | 0    | 0      | 1       | 0       | 0       | 0    | 0      | 0          | 0          | 0        |
| RM531   | 1    | 1    | 0    | 1    | 0    | 0      | 0       | 0       | 0       | 0    | 1      | 0          | 0          | 0        |
| RM531   | 0    | 0    | 1    | 0    | 1    | 0      | 0       | 0       | 0       | 0    | 0      | 1          | 1          | 0        |
| RM531   | 0    | 0    | 0    | 0    | 0    | 1      | 0       | 0       | 1       | 1    | 0      | 0          | 0          | 1        |
| RM531   | 0    | 0    | 0    | 0    | 0    | 0      | 0       | 1       | 0       | 0    | 0      | 0          | 0          | 0        |
| RM80    | 0    | 0    | 0    | 0    | 0    | 0      | 0       | 0       | 0       | 0    | 0      | 0          | 0          | 1        |
| RM80    | 0    | 0    | 1    | 1    | 1    | 1      | 0       | 0       | 0       | 1    | 0      | 0          | 1          | 0        |
| RM80    | 1    | 0    | 0    | 0    | 0    | 0      | 0       | 1       | 0       | 0    | 0      | 0          | 0          | 0        |
| RM80    | 0    | 1    | 0    | 0    | 0    | 0      | 0       | 0       | 0       | 0    | 0      | 0          | 0          | 0        |
| RM80    | 0    | 0    | 0    | 0    | 0    | 0      | 1       | 0       | 1       | 0    | 1      | 1          | 0          | 0        |
| RY1     | 1    | 1    | 0    | 1    | 1    | 1      | 1       | 0       | 0       | 1    | 1      | 0          | 1          | 1        |
| RY2     | 1    | 1    | 1    | 1    | 1    | 1      | 1       | 0       | 0       | 1    | 1      | 0          | 1          | 1        |
| RY3     | 1    | 1    | 1    | 1    | 1    | 1      | 1       | 0       | 0       | 0    | 1      | 0          | 1          | 1        |
| RY4     | 1    | 1    | 1    | 1    | 1    | 1      | 1       | 0       | 0       | 1    | 1      | 0          | 1          | 1        |
| RY5     | 1    | 1    | 1    | 1    | 1    | 1      | 1       | 0       | 0       | 1    | 1      | 0          | 1          | 1        |
| RY6     | 0    | 0    | 0    | 1    | 1    | 0      | 1       | 0       | 0       | 0    | 1      | 1          | 0          | 0        |
| RY7     | 1    | 1    | 1    | 1    | 1    | 0      | 0       | 1       | 0       | 1    | 1      | 0          | 1          | 0        |

1= present; 0= absent band
